# Supplementary material for: Ganoderma lucidum stimulates autophagy-dependent longevity pathways in Caenorhabditis elegans and human cells
Source: publisher site journal article supplement (doi:10.18632/aging.203068), 2021-05-20
Supplement: Supplementary file [file aging-v13i10-203068-supplementary-material-SD2.pdf]

## SUPPLEMENTARY TABLES

**Supplementary Table 1. Summary of lifespan assays performed in this study.**

| Nematode strain          | Treatment             | Median lifespan $\pm$ SEM | p value | Maximum lifespan $\pm$ SEM | p value | Trials |
|--------------------------|-----------------------|---------------------------|---------|----------------------------|---------|--------|
| SJL1 (FIB-1::GFP)        | Control water         | 13.0 $\pm$ 2.8            |         | 18.8 $\pm$ 1.6             |         | 2      |
| SJL1 (FIB-1::GFP)        | Rapamycin 400 $\mu$ M | 16.0 $\pm$ 2.8            | <0.0001 | 24.9 $\pm$ 2.6             | 0.07    | 2      |
| SJL1 (FIB-1::GFP)        | GL 2 mg/plate         | 18.5 $\pm$ 6.3            | <0.0001 | 25.7 $\pm$ 0.8             | 0.02    | 2      |
| SJL1 (FIB-1::GFP)        | GL 20 mg/plate        | 15.5 $\pm$ 2.1            | <0.0001 | 28.9 $\pm$ 2.3             | 0.02    | 2      |
| N2 (wild-type)           | Control water         | 13.5 $\pm$ 0.7            |         | 21.5 $\pm$ 1.5             |         | 2      |
| N2 (wild-type)           | Rapamycin 400 $\mu$ M | 15                        | <0.0001 | 26                         |         | 1      |
| N2 (wild-type)           | GL 2 mg/plate         | 14 $\pm$ 1.4              | <0.0001 | 24 $\pm$ 3                 | 0.26    | 2      |
| VC893 ( <i>atg18</i> )   | Control water         | 10 $\pm$ 0                |         | 15 $\pm$ 1                 |         | 2      |
| VC893 ( <i>atg18</i> )   | Rapamycin 400 $\mu$ M | 10                        | 0.7     | 16                         |         | 1      |
| VC893 ( <i>atg18</i> )   | GL 2 mg/plate         | 10 $\pm$ 0                | 0.57    | 14.25 $\pm$ 0.25           | 0.27    | 2      |
| CF1037 ( <i>daf-16</i> ) | Control water         | 15 $\pm$ 1                |         | 18.75 $\pm$ 1.25           |         | 2      |
| CF1037 ( <i>daf-16</i> ) | Rapamycin 400 $\mu$ M | 16                        | <0.0001 | 21                         |         | 1      |
| CF1037 ( <i>daf-16</i> ) | GL 2 mg/plate         | 16 $\pm$ 0                | 0.2     | 19.25 $\pm$ 1.75           | 0.41    | 2      |
| VC199 ( <i>sir-2.1</i> ) | Control water         | 13.5 $\pm$ 0.5            |         | 21.25 $\pm$ 2.25           |         | 2      |
| VC199 ( <i>sir-2.1</i> ) | Rapamycin 400 $\mu$ M | 15                        | <0.0005 | 22                         |         | 1      |
| VC199 ( <i>sir-2.1</i> ) | GL2 mg/plate          | 12.5 $\pm$ 0.5            | 0.42    | 22.5 $\pm$ 3.5             | 0.39    | 2      |
| SJL1 (FIB-1::GFP)        | Control water         | 15                        |         | 23                         |         | 1      |
| SJL1 (FIB-1::GFP)        | Rapamycin 400 $\mu$ M | 17                        | 0.033   | 24.5                       |         | 1      |
| SJL1 (FIB-1::GFP)        | 10K-1, 0.1 mg/plate   | 15                        | 0.12    | 21                         |         | 1      |
| SJL1 (FIB-1::GFP)        | 10K-1, 1 mg/plate     | 15                        | 0.99    | 24                         |         | 1      |
| SJL1 (FIB-1::GFP)        | Control water         | 15                        |         | 24.5                       |         | 1      |
| SJL1 (FIB-1::GFP)        | Rapamycin 400 $\mu$ M | 17                        | 0.081   | 26                         |         | 1      |
| SJL1 (FIB-1::GFP)        | 10K-2, 0.2 mg/plate   | 15                        | 0.53    | 25.5                       |         | 1      |
| SJL1 (FIB-1::GFP)        | 10K-2, 2 mg/plate     | 17                        | 0.046   | 25                         |         | 1      |

Maximum lifespan was calculated from the 10% of worms with the longest lifespan. Abbreviations: FIB-1, fibrillarlin; GFP, green fluorescent protein; SEM, standard error of the mean; GL, *Ganoderma lucidum* (water extract).

**Supplementary Table 2. Monosaccharide composition of the water extract of *G. lucidum* (GL) and sub-fractions 10K-1 and 10K-2.**

| Monosaccharide | GL (%) | 10K-1 (%) | 10K-2 (%) |
|----------------|--------|-----------|-----------|
| Arabinose      | 4.2    | 2.3       | 7.5       |
| Fucose         | 2.4    | 4.3       | 0.8       |
| Fructose       | 16.6   | 6.8       | 30.4      |
| Galactose      | 9.0    | 9.3       | 9.1       |
| Glucose        | 33.2   | 33.2      | 31.4      |
| Mannose        | 31.5   | 43.7      | 13.2      |
| Ribose         | 3.1    | 0.6       | 7.5       |

Monosaccharide content was determined using high-performance ion chromatography with pulsed amperometric detection.

**Supplementary Table 3. Monosaccharide molar ratio of the water extract of *G. lucidum* (GL) and sub-fractions 10K-1 and 10K-2.**

| Monosaccharide | GL   | 10K-1 | 10K-2 |
|----------------|------|-------|-------|
| Arabinose      | 0.15 | 0.06  | 0.29  |
| Fucose         | 0.08 | 0.11  | 0.03  |
| Fructose       | 0.50 | 0.16  | 0.97  |
| Galactose      | 0.27 | 0.21  | 0.29  |
| Glucose        | 1.00 | 0.76  | 1.00  |
| Mannose        | 0.95 | 1.00  | 0.42  |
| Ribose         | 0.11 | 0.02  | 0.28  |

Analysis was performed using high-performance ion chromatography with pulsed amperometric detection. Molar ratio was calculated by dividing the molarity of each monosaccharide by the highest molarity for the given specimen.

**Supplementary Table 4. Protein content of the water extract of *G. lucidum* (GL) and sub-fractions 10K-1 and 10K-2.**

|         | GL(%)       | 10K-1(%)    | 10K-2(%)    |
|---------|-------------|-------------|-------------|
| Protein | 1.73 ± 0.03 | 3.85 ± 0.04 | 0.41 ± 0.04 |

Analysis was done using the Bradford colorimetric assay. Protein content was calculated by dividing the protein concentration measured by the concentration of dry weight matter (w/v) for each sample, followed by multiplication by 100.

**Supplementary Table 5. Molecular weight analysis of 10K-1 and 10K-2 sub-fractions.**

|                                               | 10K-1  | 10K-2 |
|-----------------------------------------------|--------|-------|
| Sample concentration (mg/ml)                  | 3.14   | 4.08  |
| Peak retention volume (ml)                    | 19.54  | 22.78 |
| Mn: number average molecular weight (Da)      | 314364 | 9089  |
| Mw: weight average molecular weight (Da)      | 758028 | 83230 |
| Mp: molecular weight of the highest peak (Da) | 150993 | 45114 |
| Mw/Mn ratio (polydispersity)                  | 2.41   | 9.16  |

Analysis was done using gel permeation chromatography.
